# Supplementary material for: DEEPGENTM—A Novel Variant Calling Assay for Low Frequency Variants
Source: PubMed Central journal article supplement (PMC8065719; doi:10.3390/genes12040507), 2021-03-30
Supplement: genes-12-00507-s001.pdf [file genes-12-00507-s001.pdf]

Supplementary Materials

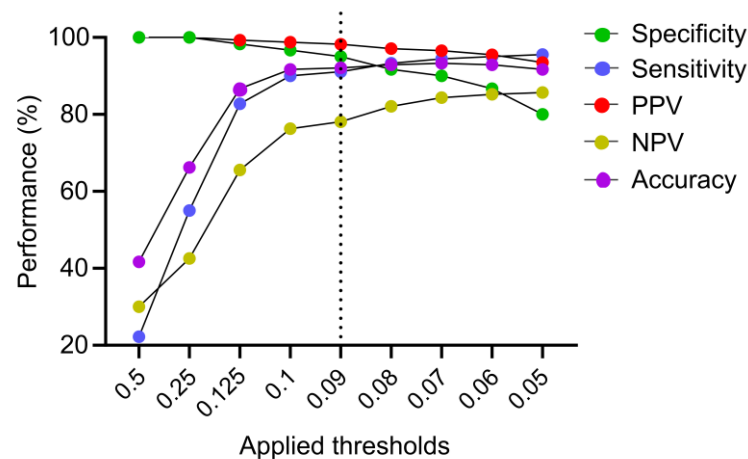

Figure S1: DEEPGENTM performance metrics at different thresholds. DEEPGENTM assay was performed with Seraseq™ ctDNA Mutation Mix v2 samples with validated minor allelic frequencies of 0.0%, 0.125%, 0.25% and 0.5% (20 ng input, n=3). Calculated are the sensitivity, specificity, the PPV and the NPA value as well as the accuracy for the DEEPGENTM assays at various VAF thresholds. A threshold of 0.09% was chosen to give the best assay performance.

Table S1: Overview of the 20 validated targets representing the overlap between the SeraCare mutation panel and the DEEPGENTM mutation panel. DEEPGENTM assay was performed with Seraseq™ ctDNA Mutation Mix v2 samples with validated minor allelic frequencies of 0.0%, 0.125%, 0.25% and 0.5% (20 ng input, n=3). Detected mutations are indicated as (1), not detected as (0). False negative and false positive values are highlighted in bold.

| Chr. | Gene   | Location  | Mutation          | 0.0% VAF |          |       | 0.125% VAF |          |          | 0.25% VAF |       |       | 0.5% VAF |          |       |
|------|--------|-----------|-------------------|----------|----------|-------|------------|----------|----------|-----------|-------|-------|----------|----------|-------|
|      |        |           |                   | Rep 1    | Rep 2    | Rep 3 | Rep 1      | Rep 2    | Rep 3    | Rep 1     | Rep 2 | Rep 3 | Rep 1    | Rep 2    | Rep 3 |
| 3    | CTNNB1 | 41266124  | A/G               | 0        | 0        | 0     | 1          | 1        | 1        | 1         | 1     | 1     | 1        | 1        | 1     |
| 3    | FOXL2  | 138665163 | G/C               | 0        | 0        | 0     | 1          | <b>0</b> | 1        | 1         | 1     | 1     | 1        | 1        | 1     |
| 3    | PIK3CA | 178936091 | G/A               | 0        | 0        | 0     | 1          | <b>0</b> | <b>0</b> | 1         | 1     | 1     | 1        | 1        | 1     |
| 3    | PIK3CA | 178952085 | A/G               | 0        | 0        | 0     | <b>0</b>   | 1        | 1        | 1         | 1     | 1     | 1        | 1        | 1     |
| 4    | FGFR3  | 1803568   | C/G               | 0        | 0        | 0     | 1          | 1        | 1        | 1         | 1     | 1     | 1        | 1        | 1     |
| 4    | KIT    | 55599321  | A/T               | 0        | 0        | 0     | 1          | 1        | 1        | 1         | 1     | 1     | 1        | 1        | 1     |
| 5    | APC    | 112175639 | C/T               | 0        | 0        | 0     | 1          | 1        | <b>0</b> | 1         | 1     | 1     | 1        | 1        | 1     |
| 7    | EGFR   | 55242466  | GAATTAAGAGAAGCA/- | 0        | 0        | 0     | 1          | <b>0</b> | <b>0</b> | 1         | 1     | 1     | 1        | 1        | 1     |
| 7    | EGFR   | 55249071  | C/T               | 0        | <b>1</b> | 0     | 1          | <b>0</b> | 1        | 1         | 1     | 1     | 1        | 1        | 1     |
| 7    | EGFR   | 55259515  | T/G               | 0        | 0        | 0     | 1          | 1        | 0        | 1         | 1     | 1     | 1        | 1        | 1     |
| 7    | BRAF   | 140453136 | A/T               | 0        | <b>1</b> | 0     | <b>0</b>   | 1        | 1        | 1         | 1     | 1     | 1        | <b>0</b> | 1     |

|    |       |           |     |   |   |          |          |          |          |   |          |   |   |   |   |
|----|-------|-----------|-----|---|---|----------|----------|----------|----------|---|----------|---|---|---|---|
| 9  | JAK2  | 5073770   | G/T | 0 | 0 | 0        | 1        | 1        | <b>0</b> | 1 | 1        | 1 | 1 | 1 | 1 |
| 10 | RET   | 43617416  | T/C | 0 | 0 | 0        | <b>0</b> | <b>0</b> | 1        | 1 | 1        | 1 | 1 | 1 | 1 |
| 12 | KRAS  | 25398284  | C/T | 0 | 0 | 0        | 1        | 1        | 1        | 1 | 1        | 1 | 1 | 1 | 1 |
| 14 | AKT1  | 105246551 | C/T | 0 | 0 | 0        | 1        | 1        | 1        | 1 | 1        | 1 | 1 | 1 | 1 |
| 17 | TP53  | 7577120   | C/T | 0 | 0 | <b>1</b> | 1        | 1        | 1        | 1 | 1        | 1 | 1 | 1 | 1 |
| 17 | TP53  | 7577538   | C/T | 0 | 0 | 0        | 1        | 1        | 1        | 1 | <b>0</b> | 1 | 1 | 1 | 1 |
| 17 | TP53  | 7578406   | C/T | 0 | 0 | 0        | 1        | 1        | 1        | 1 | 1        | 1 | 1 | 1 | 1 |
| 19 | GNA11 | 3118942   | A/T | 0 | 0 | 0        | 1        | 1        | 1        | 1 | 1        | 1 | 1 | 1 | 1 |
| 20 | GNAS  | 57484420  | C/T | 0 | 0 | 0        | 1        | <b>0</b> | 1        | 1 | 1        | 1 | 1 | 1 | 1 |

Table S2: DEEPGEN™ sensitivity at different input amounts. Seraseq™ ctDNA Mutation Mix v2 reference standard with validated minor allelic frequencies of 0.125% VAF and various cfDNA input (5ng and 20ng) was used for sequencing. Detected mutations are indicated as (1), not detected as (0). False negatives were highlighted in bold.

| Chr. | Gene   | Location  | Mutation          | 5 ng     |          |          |          | 20 ng    |          |          |
|------|--------|-----------|-------------------|----------|----------|----------|----------|----------|----------|----------|
|      |        |           |                   | Rep 1    | Rep 2    | Rep 3    | Rep 4    | Rep1     | Rep 2    | Rep 3    |
| 3    | CTNNB1 | 41266124  | A/G               | 1        | <b>0</b> | <b>0</b> | 1        | 1        | 1        | 1        |
| 3    | FOXL2  | 138665163 | G/C               | <b>0</b> | 1        | <b>0</b> | <b>0</b> | 1        | <b>0</b> | 1        |
| 3    | PIK3CA | 178936091 | G/A               | 1        | <b>0</b> | 1        | 1        | 1        | <b>0</b> | <b>0</b> |
| 3    | PIK3CA | 178952085 | A/G               | 1        | 1        | 1        | 1        | <b>0</b> | 1        | 1        |
| 4    | FGFR3  | 1803568   | C/G               | 1        | 1        | 1        | <b>0</b> | 1        | 1        | 1        |
| 4    | KIT    | 55599321  | A/T               | <b>0</b> | <b>0</b> | <b>0</b> | 1        | 1        | 1        | 1        |
| 5    | APC    | 112175639 | C/T               | 1        | <b>0</b> | 1        | <b>0</b> | 1        | 1        | <b>0</b> |
| 7    | EGFR   | 55242466  | GAATTAAGAGAAGCA/- | <b>0</b> | 1        | 1        | 1        | 1        | <b>0</b> | <b>0</b> |
| 7    | EGFR   | 55249071  | C/T               | 1        | 1        | 1        | 1        | 1        | <b>0</b> | 1        |
| 7    | EGFR   | 55259515  | T/G               | 1        | 1        | 1        | 1        | 1        | 1        | <b>0</b> |
| 7    | BRAF   | 140453136 | A/T               | <b>0</b> | 1        | <b>0</b> | 1        | <b>0</b> | 1        | 1        |
| 9    | JAK2   | 5073770   | G/T               | 1        | <b>0</b> | 1        | 1        | 1        | 1        | <b>0</b> |
| 10   | RET    | 43617416  | T/C               | 1        | <b>0</b> | 1        | <b>0</b> | <b>0</b> | <b>0</b> | 1        |
| 12   | KRAS   | 25398284  | C/T               | 1        | <b>0</b> | <b>0</b> | 1        | 1        | 1        | 1        |
| 14   | AKT1   | 105246551 | C/T               | 1        | <b>0</b> | 1        | <b>0</b> | 1        | 1        | 1        |
| 17   | TP53   | 7577120   | C/T               | 1        | 1        | 1        | 1        | 1        | 1        | 1        |
| 17   | TP53   | 7577538   | C/T               | <b>0</b> | 1        | <b>0</b> | 1        | 1        | 1        | 1        |
| 17   | TP53   | 7578406   | C/T               | 1        | 1        | 1        | <b>0</b> | 1        | 1        | 1        |
| 19   | GNA11  | 3118942   | A/T               | 1        | <b>0</b> | <b>0</b> | <b>0</b> | 1        | 1        | 1        |
| 20   | GNAS   | 57484420  | C/T               | 1        | <b>0</b> | <b>0</b> | 1        | 1        | <b>0</b> | 1        |

Table S3: Intra-assay reproducibility. Six independent runs of the DEEPGEN™ assay using Seraseq™ ctDNA Mutation Mix v2 with 20 validated minor allelic frequencies of 0.5% were performed. Shown is the genome position of the 20 variants and their respective VAF [in %] of all six replicates. Shown as well is the average VAF [in %], highlighted in bold and the SD.

| Chr. | Gene   | Location  | Mutation          | Rep 1 | Rep 2 | Rep 3 | Rep 4 | Rep 5 | Rep 6 | Average     | SD   |
|------|--------|-----------|-------------------|-------|-------|-------|-------|-------|-------|-------------|------|
| 3    | CTNNB1 | 41266124  | A/G               | 0.11  | 0.36  | 0.30  | 0.37  | 0.79  | 0.56  | <b>0.41</b> | 0.22 |
| 3    | FOXL2  | 138665163 | G/C               | 0.37  | 0.51  | 0.68  | 0.69  | 0.60  | 0.58  | <b>0.57</b> | 0.12 |
| 3    | PIK3CA | 178936091 | G/A               | 0.13  | 0.11  | 0.22  | 0.17  | 0.21  | 0.51  | <b>0.22</b> | 0.14 |
| 3    | PIK3CA | 178952085 | A/G               | 0.58  | 0.57  | 0.50  | 0.73  | 0.61  | 0.43  | <b>0.57</b> | 0.10 |
| 4    | FGFR3  | 1803568   | C/G               | 0.28  | 0.61  | 0.68  | 0.69  | 0.78  | 0.58  | <b>0.61</b> | 0.16 |
| 4    | KIT    | 55599321  | A/T               | 0.29  | 0.40  | 0.54  | 0.37  | 0.25  | 0.54  | <b>0.40</b> | 0.12 |
| 5    | APC    | 112175639 | C/T               | 0.41  | 0.27  | 0.39  | 0.33  | 0.41  | 0.30  | <b>0.35</b> | 0.06 |
| 7    | EGFR   | 55242466  | GAATTAAGAGAAGCA/- | 0.33  | 0.52  | 0.21  | 0.43  | 0.68  | 0.67  | <b>0.47</b> | 0.18 |
| 7    | EGFR   | 55249071  | C/T               | 0.52  | 0.46  | 0.54  | 0.76  | 0.39  | 0.53  | <b>0.53</b> | 0.12 |
| 7    | EGFR   | 55259515  | T/G               | 0.70  | 0.42  | 0.59  | 0.79  | 0.52  | 0.61  | <b>0.61</b> | 0.12 |
| 7    | BRAF   | 140453136 | A/T               | 0.53  | 0.29  | 0.38  | 0.00  | 0.62  | 0.37  | <b>0.37</b> | 0.20 |
| 9    | JAK2   | 5073770   | G/T               | 0.17  | 0.55  | 0.17  | 0.15  | 0.46  | 0.40  | <b>0.32</b> | 0.17 |
| 10   | RET    | 43617416  | T/C               | 0.45  | 0.74  | 0.41  | 0.56  | 0.63  | 0.49  | <b>0.55</b> | 0.12 |
| 12   | KRAS   | 25398284  | C/T               | 0.58  | 0.75  | 0.40  | 0.52  | 0.59  | 0.34  | <b>0.53</b> | 0.14 |
| 14   | AKT1   | 105246551 | C/T               | 0.23  | 0.22  | 0.24  | 0.51  | 0.48  | 0.54  | <b>0.37</b> | 0.15 |
| 17   | TP53   | 7577120   | C/T               | 0.68  | 0.55  | 0.55  | 0.95  | 0.77  | 0.58  | <b>0.68</b> | 0.15 |
| 17   | TP53   | 7577538   | C/T               | 0.20  | 0.31  | 0.30  | 0.39  | 0.35  | 0.31  | <b>0.31</b> | 0.06 |
| 17   | TP53   | 7578406   | C/T               | 0.53  | 0.58  | 0.42  | 0.57  | 0.57  | 0.84  | <b>0.59</b> | 0.13 |
| 19   | GNA11  | 3118942   | A/T               | 0.74  | 0.50  | 0.59  | 0.64  | 0.89  | 0.47  | <b>0.64</b> | 0.15 |
| 20   | GNAS   | 57484420  | C/T               | 0.44  | 0.26  | 0.82  | 0.53  | 0.38  | 0.70  | <b>0.52</b> | 0.20 |

Table S4: Comparison of Quantgene's DEEPGEN™ with the AVENIO assay over 13 validated targets with four different VAFs (0%, 0.125%, 0.25%, 0.5%). Detected mutations are indicated as (1), not detected as (0). False negatives were highlighted in bold.

| Chr. | Gene   | Location  | Mutation | 0% VAF   |        | 0.125% VAF |          | 0.25% VAF |        | 0.5% VAF |        |
|------|--------|-----------|----------|----------|--------|------------|----------|-----------|--------|----------|--------|
|      |        |           |          | DEEPGEN™ | AVENIO | DEEPGEN™   | AVENIO   | DEEPGEN™  | AVENIO | DEEPGEN™ | AVENIO |
| 5    | APC    | 112175639 | C/T      | 0        | 0      | 1          | 1        | 1         | 1      | 1        | 1      |
| 7    | BRAF   | 140453136 | A/T      | 0        | 0      | <b>0</b>   | <b>0</b> | 1         | 1      | 1        | 1      |
| 3    | CTNNB1 | 41266124  | A/G      | 0        | 0      | 1          | <b>0</b> | 1         | 1      | 1        | 1      |
| 7    | EGFR   | 55249071  | C/T      | 0        | 0      | 1          | <b>0</b> | 1         | 1      | 1        | 1      |
| 7    | EGFR   | 55259515  | T/G      | 0        | 0      | 1          | <b>0</b> | 1         | 1      | 1        | 1      |

---

|    |        |           |     |   |   |   |   |   |   |   |   |
|----|--------|-----------|-----|---|---|---|---|---|---|---|---|
| 4  | KIT    | 55599321  | A/T | 0 | 0 | 1 | 0 | 1 | 1 | 1 | 1 |
| 12 | KRAS   | 25398284  | C/T | 0 | 0 | 1 | 1 | 1 | 1 | 1 | 1 |
| 3  | PIK3CA | 178936091 | G/A | 0 | 0 | 0 | 0 | 1 | 0 | 1 | 1 |
| 3  | PIK3CA | 178952085 | A/G | 0 | 0 | 1 | 0 | 1 | 0 | 1 | 1 |
| 10 | RET    | 43617416  | T/C | 0 | 0 | 0 | 1 | 1 | 1 | 1 | 1 |
| 17 | TP53   | 7577120   | C/T | 0 | 0 | 1 | 0 | 1 | 0 | 1 | 1 |
| 17 | TP53   | 7577538   | C/T | 0 | 0 | 1 | 0 | 1 | 0 | 1 | 1 |
| 17 | TP53   | 7578406   | C/T | 0 | 0 | 1 | 0 | 1 | 0 | 1 | 1 |

---
